# Supplementary material for: Serum biomarkers and outcomes in patients with moderate COPD: a substudy of the randomised SUMMIT trial
Source: PubMed Central journal article supplement — BMJ Open Respir Res. 2019 May 4;6(1):e000431. doi: 10.1136/bmjresp-2019-000431 (PMC6561388; doi:10.1136/bmjresp-2019-000431), 2019-05-04
Supplement: bmjresp-2019-000431supp001.pdf [file bmjresp-2019-000431supp001.pdf]

**Supplementary table 1** Baseline biomarker tertile groupings

| <b>Biomarker</b>          | <b>Tertile grouping</b> | <b>Values</b>       |
|---------------------------|-------------------------|---------------------|
| <b>CRP (mg/L)</b>         | Lowest tertile (N=553)  | <2.14               |
|                           | Middle tertile (N=552)  | ≥2.14 to <5.26      |
|                           | Highest tertile (N=553) | ≥5.26               |
| <b>sRAGE (ng/L)</b>       | Lowest tertile (N=550)  | <571                |
|                           | Middle tertile (N=550)  | ≥571 to <790        |
|                           | Highest tertile (N=549) | ≥790                |
| <b>SPD (μg/L)</b>         | Lowest tertile (N=553)  | <168                |
|                           | Middle tertile (N=552)  | 168 ≤ to <286       |
|                           | Highest tertile (N=551) | ≥ 286               |
| <b>Fibrinogen (mg/dL)</b> | Lowest tertile (N=538)  | <292                |
|                           | Middle tertile (N=532)  | ≥292 to <366        |
|                           | Highest tertile (N=530) | ≥366                |
| <b>CC-16 (μg/L)</b>       | Lowest tertile (N=552)  | <0.00691            |
|                           | Middle tertile (N=552)  | ≥0.00691 to <0.0117 |
|                           | Highest tertile (N=552) | ≥0.0117             |

CC-16, club cell protein 16; CRP, C-reactive protein; SPD, surfactant protein D; sRAGE, soluble receptor of activated glycogen end-product.

**Supplementary table 2** Effect of inhaled therapy on CC-16 at 3 months

|                                                                | <b>Placebo<br/>(N=439)</b> | <b>FF 100<br/>(N=415)</b> | <b>VI 25<br/>(N=416)</b>  | <b>FF/VI 100/25<br/>(N=403)</b> |
|----------------------------------------------------------------|----------------------------|---------------------------|---------------------------|---------------------------------|
| Number of patients with baseline and 3-month CC-16             | 337                        | 341                       | 343                       | 334                             |
| Baseline CC-16, geometric mean, µg/L                           | 0.0088                     | 0.0089                    | 0.0087                    | 0.0087                          |
| CC-16 at 3 months, adjusted geometric mean, µg/L               | 0.0091                     | 0.0085                    | 0.0085                    | 0.0083                          |
| Adjusted ratio to baseline                                     | 1.043                      | 0.967                     | 0.975                     | 0.953                           |
| Ratio of 3-month CC-16 in active treatment vs placebo (95% CI) |                            | 0.927<br>(0.885 to 0.972) | 0.935<br>(0.893 to 0.979) | 0.914<br>(0.872 to 0.957)       |
| P value                                                        |                            | 0.001                     | 0.005                     | <0.001                          |

Model is ANCOVA of log transformed CC-16, adjusted for baseline CC-16, age and gender. Note that due to log transformation, SE are not displayed.

ANCOVA, analysis of covariance; CC-16, club cell protein 16; CI, confidence interval; FF, fluticasone furoate; VI, vilanterol.

**Supplementary table 3** Effect of the inhaled therapy on systemic levels of CRP, sRAGE, SPD and fibrinogen versus placebo

|                                                                | <b>Placebo<br/>(N=439)</b> | <b>FF 100<br/>(N=415)</b> | <b>VI 25<br/>(N=416)</b>  | <b>FF/VI 100/25<br/>(N=403)</b> |
|----------------------------------------------------------------|----------------------------|---------------------------|---------------------------|---------------------------------|
| Baseline CRP, geometric mean, mg/L                             | 3.21                       | 3.61                      | 3.52                      | 3.46                            |
| CRP at 3 months, adjusted geometric mean, mg/L                 | 3.52                       | 3.54                      | 3.34                      | 3.72                            |
| Adjusted ratio to baseline                                     | 1.020                      | 1.026                     | 0.969                     | 1.080                           |
| Ratio of 3-month CRP in active treatment vs placebo (95% CI)   |                            | 1.006<br>(0.887 to 1.141) | 0.950<br>(0.838 to 1.078) | 1.059<br>(0.933 to 1.202)       |
| Baseline sRAGE, geometric mean, ng/L                           | 706                        | 716                       | 717                       | 680                             |
| sRAGE at 3 months, adjusted geometric mean, ng/L               | 697                        | 679                       | 699                       | 685                             |
| Adjusted ratio to baseline                                     | 0.989                      | 0.964                     | 0.992                     | 0.973                           |
| Ratio of 3-month sRAGE in active treatment vs placebo (95% CI) |                            | 0.975<br>(0.944 to 1.007) | 1.003<br>(0.971 to 1.035) | 0.983<br>(0.952 to 1.015)       |
| Baseline SPD, geometric mean, µg/L                             | 204                        | 212                       | 218                       | 200                             |
| SPD at 3 months, adjusted geometric mean, µg/L                 | 207                        | 205                       | 197                       | 196                             |
| Adjusted ratio to baseline                                     | 0.994                      | 0.982                     | 0.946                     | 0.938                           |
| Ratio of 3-month SPD in active treatment vs placebo (95% CI)   |                            | 0.988<br>(0.925 to 1.055) | 0.952<br>(0.891 to 1.017) | 0.944<br>(0.883 to 1.009)       |

|                                                                  |              |                         |                        |                       |
|------------------------------------------------------------------|--------------|-------------------------|------------------------|-----------------------|
| Baseline Fibrinogen, mean, mg/dL (SD)                            | 331.5 (88.6) | 333.7 (88.7)            | 326.3 (91.0)           | 327.1 (86.9)          |
| Fibrinogen* at 3 months, adjusted mean, mg/dL (SE)               | 329.7 (5.0)  | 327.1 (4.9)             | 324.3 (4.9)            | 334.3 (5.0)           |
| Adjusted mean change from baseline (SE)                          | 0.0 (5.0)    | -2.5 (4.9)              | -5.4 (4.9)             | 4.7 (5.0)             |
| Difference in Fibrinogen in active treatment vs placebo (95% CI) |              | -2.5<br>(-16.3 to 11.2) | -5.4<br>(-19.1 to 8.3) | 4.6<br>(-9.2 to 18.4) |

Models are ANCOVA of log transformed\* biomarker, adjusted for baseline biomarker, age and gender, (\*Except Fibrinogen which was not log transformed as this marker was Normally distributed on natural scale). Note that due to log transformation, SE are not displayed.

ANCOVA, analysis of covariance; CC-16, club cell protein 16; CI, confidence interval; FF, fluticasone furoate; VI, vilanterol.

## **SUPPLEMENTARY FIGURE LEGENDS**

**Supplementary figure 1** Hazard ratios for time to first moderate or severe COPD exacerbation by biomarker tertile groups. CC-16, club cell protein 16; CI, confidence interval; COPD, chronic obstructive pulmonary disease; CRP, C-reactive protein; sRAGE, soluble receptor of activated glycogen end-product.

**Supplementary figure 2** Hazard ratios for time to first hospitalised COPD exacerbation by biomarker tertile groups. CC-16, club cell protein 16; CI, confidence interval; COPD, chronic obstructive pulmonary disease; CRP, C-reactive protein; sRAGE, soluble receptor of activated glycogen end-product.

**Supplementary figure 3** Hazard ratios for time to death from any cause by biomarker tertile groups. CC-16, club cell protein 16; CI, confidence interval; CRP, C-reactive protein; sRAGE, soluble receptor of activated glycogen end-product.

**Supplementary figure 4** Hazard ratios for time to cardiovascular death by biomarker tertile groups. CC-16, club cell protein 16; CI, confidence interval; CRP, C-reactive protein; sRAGE, soluble receptor of activated glycogen end-product.

**Supplementary figure 1** Hazard ratios for time to first moderate or severe COPD exacerbation by biomarker tertile groups.

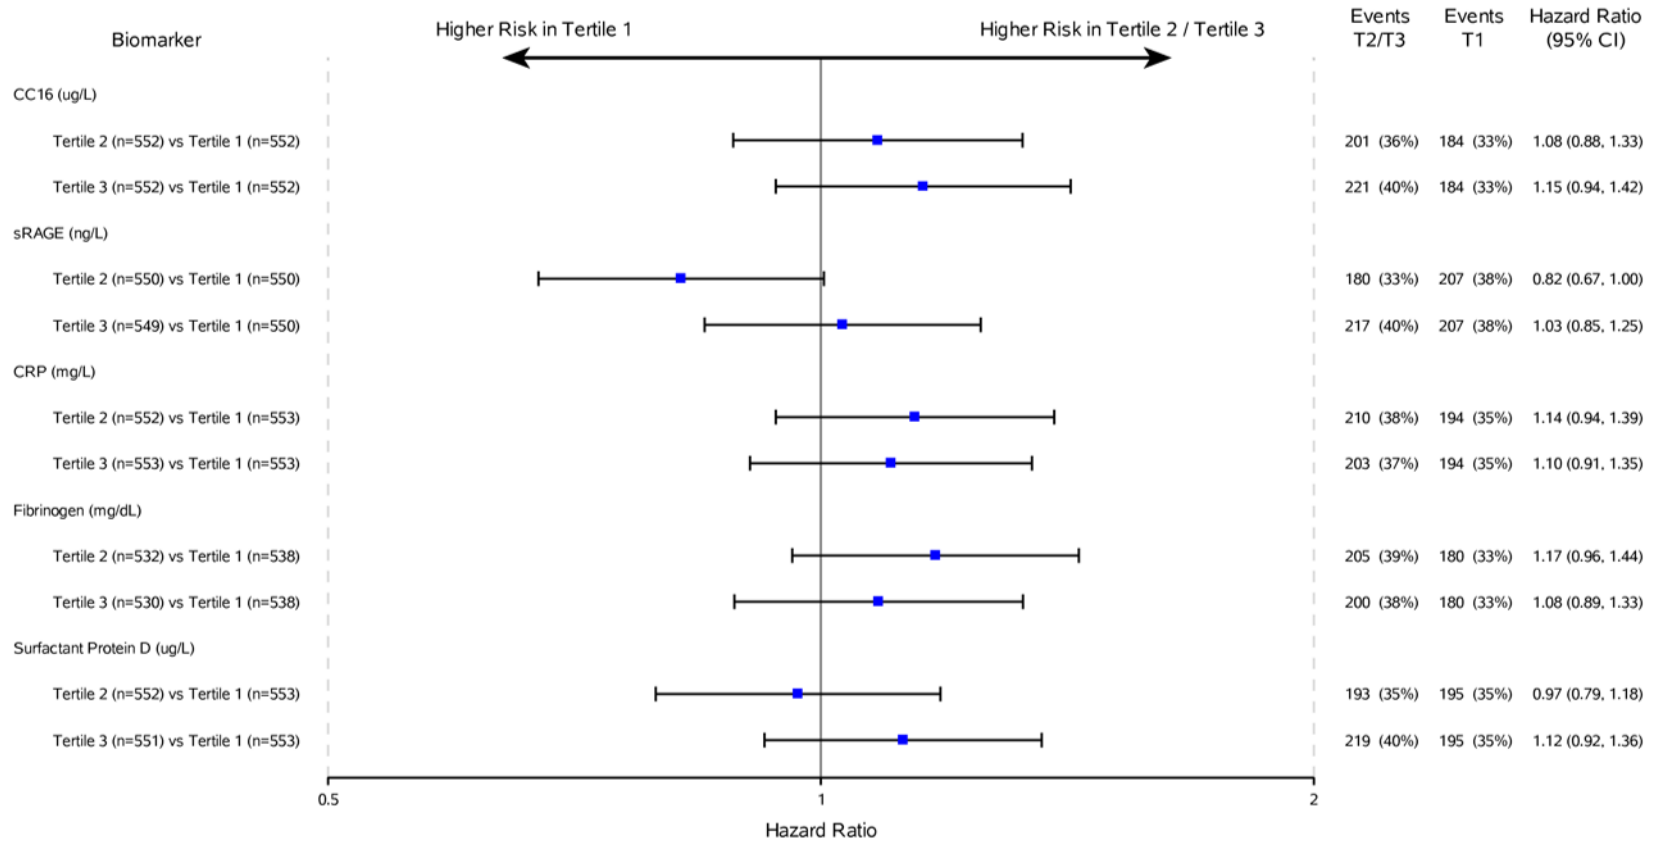

Hazard Ratios from Cox Proportional Hazard model adjusted for treatment, age and gender and number of moderate/severe COPD exacerbations in 12 months prior to screening

**Supplementary figure 2** Hazard ratios for time to first hospitalised COPD exacerbation by biomarker tertile groups.

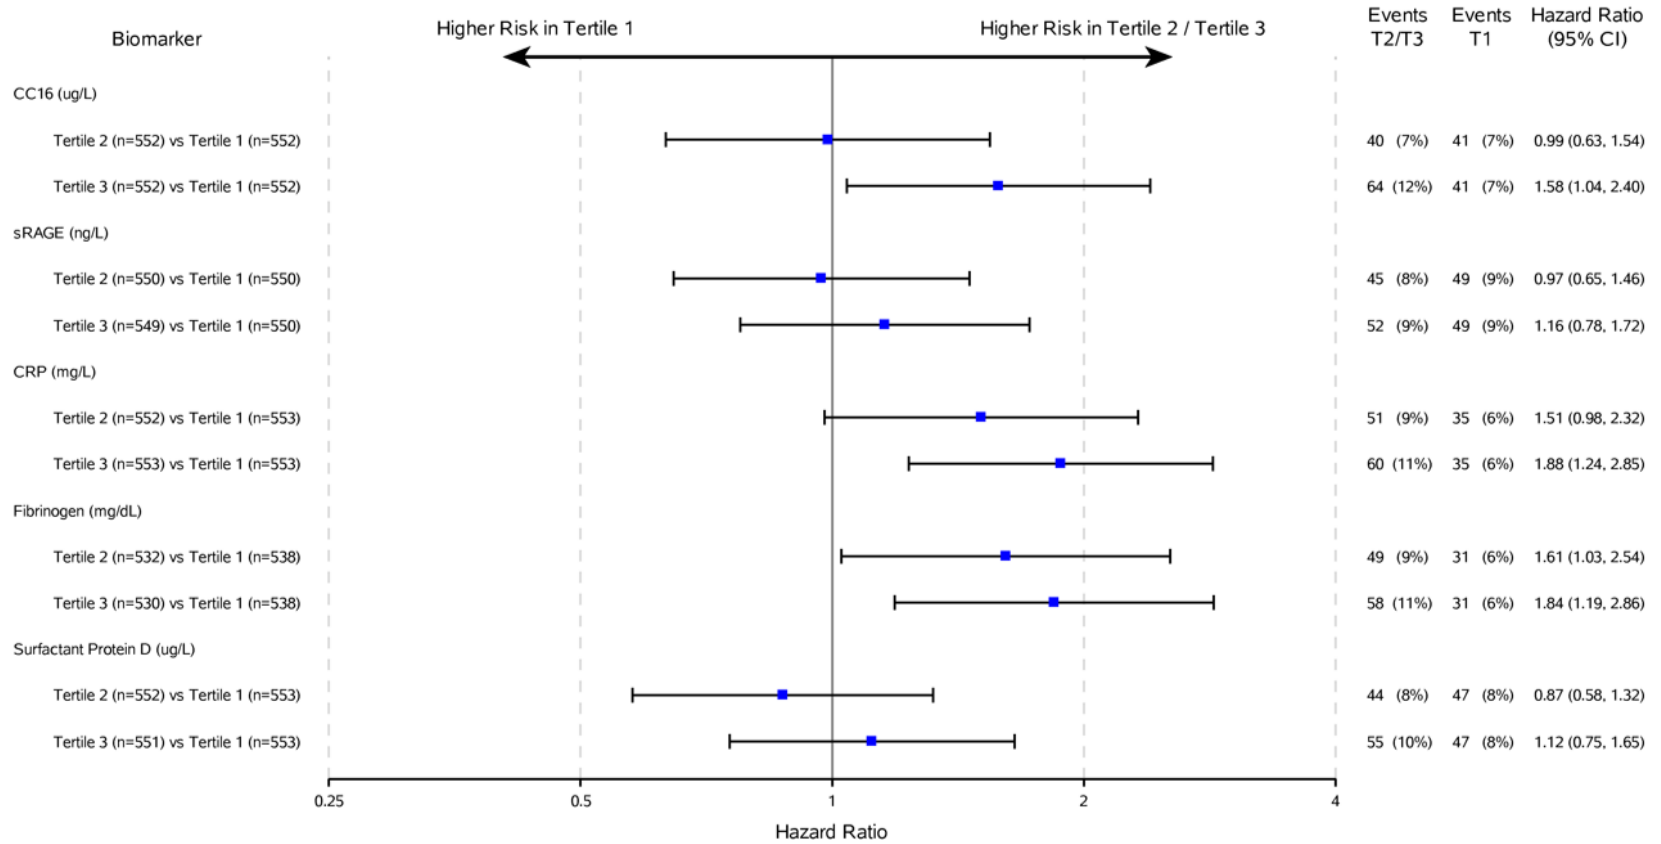

Hazard Ratios from Cox Proportional Hazard model adjusted for treatment, age and gender and number of moderate/severe COPD exacerbations in 12 months prior to screening

**Supplementary figure 3** Hazard ratios for time to death from any cause by biomarker tertile groups.

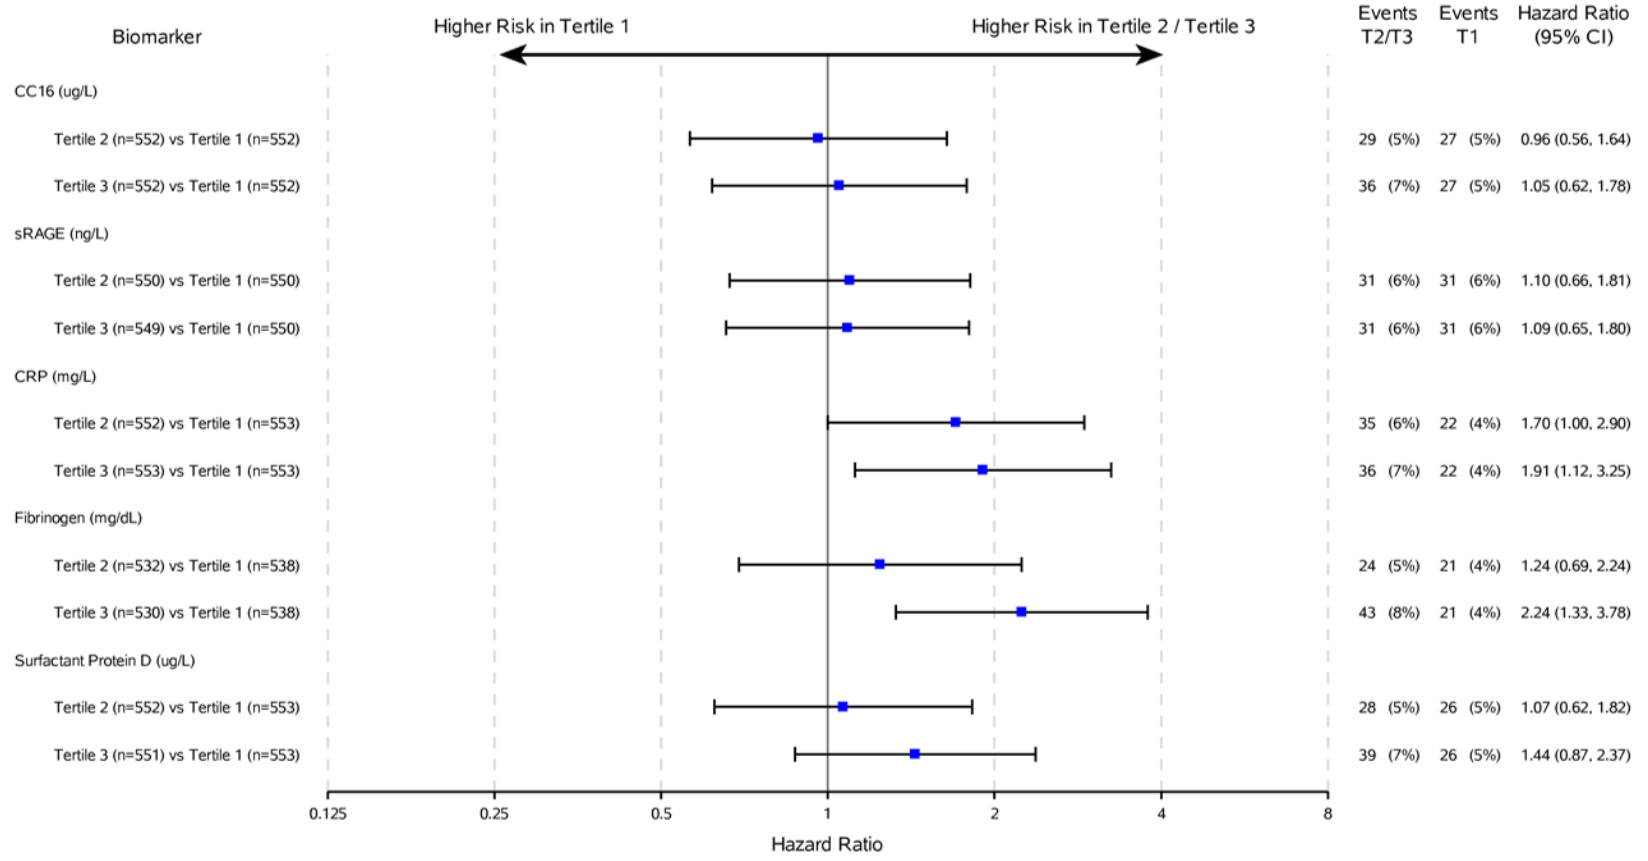

Hazard Ratios from Cox Proportional Hazard model adjusted for treatment, age and gender.



**Supplementary figure 4** Hazard ratios for time to cardiovascular death by biomarker tertile groups.

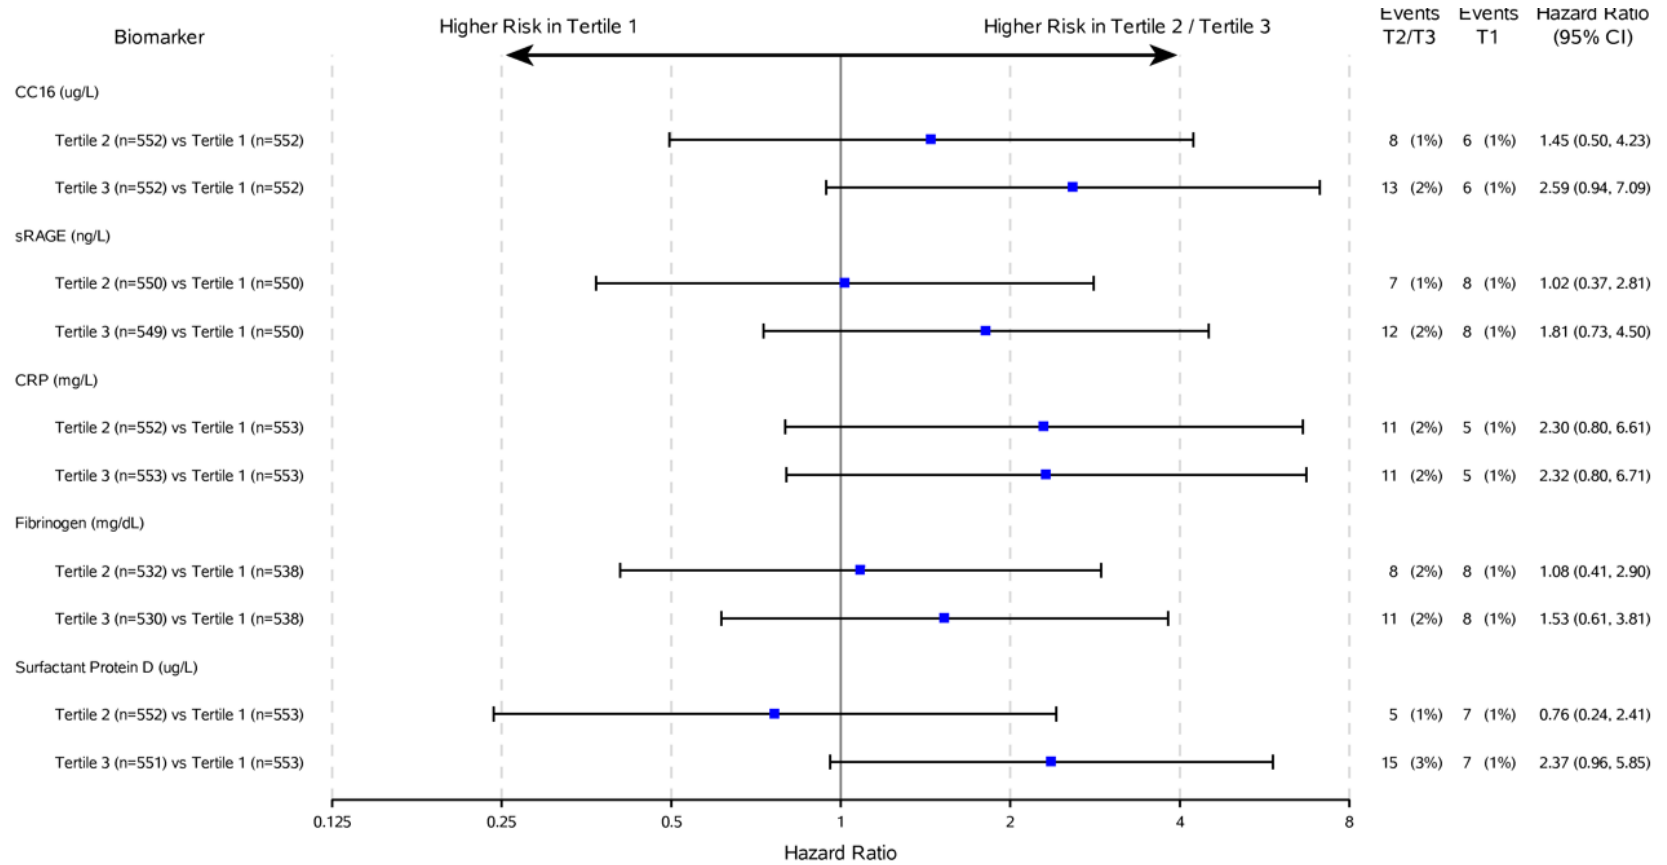

Hazard Ratios from Cox Proportional Hazard model adjusted for treatment, age and gender
